# Supplementary material for: Amalgam Phase-Down Part 1: UK-Based Posterior Restorative Material and Technique Use
Source: PubMed Central journal article supplement (PMC8674792; doi:10.1177/2380084420978653), 2020-12-10
Supplement: sj-pdf-1-jct-10.1177_2380084420978653.pdf [file sj-pdf-1-jct-10.1177_2380084420978653.pdf]

# **Amalgam phase-down part 1: UK based posterior restorative material and technique use**

Bailey OS, Vernazza CR, Stone S, Ternent L, Roche A-G, Lynch CD

## **Appendix**

Questionnaire pg 1

Appendix results tables pg 19

## **Questionnaire**

Online questionnaire available at:

<https://www.smartsurvey.co.uk/s/preview/82YU5/A693DA6425DF4DAB4A113A34AEF0E2>

A Newcastle University, BDA and BSDHT study on alternatives to dental amalgam

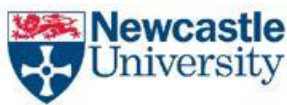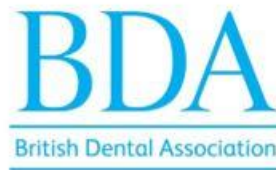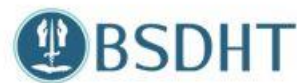

The phase-down of amalgam is currently a much-debated topic in dentistry in the UK. We would hugely value your input on this topic.

This questionnaire is a collaboration between Newcastle University, the British Dental Association (BDA) and the British Society of Dental Hygiene and Therapy (BSDHT). The data will be used in a PhD project that is being undertaken at Newcastle University. This will investigate the cost effectiveness of directly placed restorative materials, compared to dental amalgam. The results will be used by the BDA to campaign on this issue and to advise governments on the issues for dentists in relation to amalgam phase-down. The BSDHT will use them to inform policy.

This survey will assess current material use, and techniques employed in the direct (non-laboratory) restoration of posterior teeth. It will also assess the opinions of dentists and therapists surrounding this topic, so your participation would be greatly appreciated and is important for the validity of this study. We would like you to be as honest as possible about your individual practice and opinions.

The questionnaire should take around 10 minutes to complete. Only complete this questionnaire if you place direct posterior restorations and please do not forward the web link on to avoid sampling

errors.

Identifiable information will be separated from responses prior to transfer and analysis at Newcastle University, therefore all information will be anonymous. This study has ethical approval from Newcastle University.

The results of the survey and the cost effectiveness analysis will be submitted for publication in due course.

If you wish to opt-out of this survey at any point, please email [Research@bda.org](mailto:Research@bda.org) with "AM OPT-OUT" in the subject line.

## GDPR statement

### How the information will be used

The information is collected by the British Dental Association (BDA) to support the policy activity it undertakes on behalf of the profession, to provide evidence in a PhD project undertaken at Newcastle University and to inform BSDHT policy. All data will be used for research purposes only and any information you provide will be treated confidentially.

### What happens to the data collected?

Data from all participants will be coded, combined and analysed independently. Parts of the study may also be submitted for publication. Direct quotes from the survey may be used in reports and publications but quotes will be anonymised to ensure that participants cannot be identified.

### Storage of your personal data

All information you provide to us is stored on secure servers. The data that we collect from you will not be transferred to, or stored at, a destination outside the European Economic Area ("EEA"). Your personal data collected through this survey will be stored for up to seven years. Data will be stored on our servers and our survey platform which is SmartSurvey.

### Access to information

You have the right to request a copy of the information we hold about you.

### What do I need to do?

You are not required to take part in this study but your participation will help us to improve the working lives of dentists and therapists. Your information will be aggregated with the other respondents' information.

### The data controller

For the purpose of the General Data Protection Regulation 2018 (the Act), the data controller is The British Dental Association of 64 Wimpole Street, London W1G 8YS.

The data processor

For the purpose of the Act, the data processors are both The British Dental Association and SmartSurvey Ltd of Unit 23, Basepoint Business Center, Tewkesbury, GL20 8SD. For more information, consult their Privacy Policy and Notice at <https://www.smartsurvey.co.uk/privacy-policy>, Part 2 covers Privacy of Survey Respondents.

If you are not happy

If you feel that we have mistreated the handling of your data please contact us in the first instance. If you are not satisfied with our response you are entitled to lodge a complaint with the Information Commissioner, Wycliffe House, Water Lane, Wilmslow SK9 5AF.

Thank you for taking the time to read this information

## 2. HOW TO NAVIGATE ...

To navigate the questionnaire, please use the Previous Page and Next Page buttons located at the bottom of each page.

Please do not use the back arrow of your web browser as this will exit the study.

In the eventuality that this happens, please go back to your email invitation and click once more on your SmartSurvey link.

**I confirm that I have read and understand the purpose of this research and have had the opportunity to consider the information and my involvement. \***

Yes

No

**I understand that my involvement is voluntary and I consent to participating in this study. \***

Yes

No

**I currently practice dentistry and I place direct posterior restorations. \***

Yes

No

## **4. FREQUENCY OF PLACEMENT OF DIRECT POSTERIOR RESTORATIONS**

**When definitively restoring premolar teeth (NOT class V or localised cervical) with directly placed materials, what percentage would you estimate you restore with? Sum total should equal 100%**

Composite

Amalgam

GIC/RMGIC/Other

**When definitively restoring molar teeth (NOT class V or localised cervical) with directly placed materials, what percentage would you estimate you restore with? Sum total should equal 100%**

Composite

Amalgam

GIC/RMGIC/Other

## **5. TECHNIQUE**

How often do you use the following techniques when placing direct posterior restorations (NOT class V or localised cervical) of the indicated materials? Only select 'not applicable' if you do not place any direct posterior restorations using the indicated material. Rubber dam

|           | 0%                       | 1-10%                    | 11-25%                   | 26-50%                   | 51-75%                   | 76-99%                   | 100%                     | not applicable           |
|-----------|--------------------------|--------------------------|--------------------------|--------------------------|--------------------------|--------------------------|--------------------------|--------------------------|
| Amalgam   | <input type="checkbox"/> | <input type="checkbox"/> | <input type="checkbox"/> | <input type="checkbox"/> | <input type="checkbox"/> | <input type="checkbox"/> | <input type="checkbox"/> | <input type="checkbox"/> |
| Composite | <input type="checkbox"/> | <input type="checkbox"/> | <input type="checkbox"/> | <input type="checkbox"/> | <input type="checkbox"/> | <input type="checkbox"/> | <input type="checkbox"/> | <input type="checkbox"/> |

Liner (in cavities with no obvious pulp exposure)

|         | 0%                       | 1-10%                    | 11-25%                   | 26-50%                   | 51-75%                   | 76-99%                   | 100%                     | not applicable           |
|---------|--------------------------|--------------------------|--------------------------|--------------------------|--------------------------|--------------------------|--------------------------|--------------------------|
| Amalgam | <input type="checkbox"/> | <input type="checkbox"/> | <input type="checkbox"/> | <input type="checkbox"/> | <input type="checkbox"/> | <input type="checkbox"/> | <input type="checkbox"/> | <input type="checkbox"/> |

Please specify materials used under amalgam

|           | 0%                       | 1-10%                    | 11-25%                   | 26-50%                   | 51-75%                   | 76-99%                   | 100%                     | not applicable           |
|-----------|--------------------------|--------------------------|--------------------------|--------------------------|--------------------------|--------------------------|--------------------------|--------------------------|
| Composite | <input type="checkbox"/> | <input type="checkbox"/> | <input type="checkbox"/> | <input type="checkbox"/> | <input type="checkbox"/> | <input type="checkbox"/> | <input type="checkbox"/> | <input type="checkbox"/> |

Please specify materials used under composite

## 6. TECHNIQUE

How often do you use the following techniques when placing direct posterior restorations (NOT class V or localised cervical) of the indicated materials? Only select 'not applicable' if you do not place any direct posterior restorations using the indicated material. Matrix bands (when restoring a lost proximal surface) Circumferential metal (e.g. Siqveland, Toffelmire, Disposable types)

|           | 0%                       | 1-10%                    | 11-25%                   | 26-50%                   | 51-75%                   | 76-99%                   | 100%                     | not applicable           |
|-----------|--------------------------|--------------------------|--------------------------|--------------------------|--------------------------|--------------------------|--------------------------|--------------------------|
| Amalgam   | <input type="checkbox"/> | <input type="checkbox"/> | <input type="checkbox"/> | <input type="checkbox"/> | <input type="checkbox"/> | <input type="checkbox"/> | <input type="checkbox"/> | <input type="checkbox"/> |
| Composite | <input type="checkbox"/> | <input type="checkbox"/> | <input type="checkbox"/> | <input type="checkbox"/> | <input type="checkbox"/> | <input type="checkbox"/> | <input type="checkbox"/> | <input type="checkbox"/> |

Circumferential clear (e.g. Disposable types)

|           | 0%                       | 1-10%                    | 11-25%                   | 26-50%                   | 51-75%                   | 76-99%                   | 100%                     | not applicable           |
|-----------|--------------------------|--------------------------|--------------------------|--------------------------|--------------------------|--------------------------|--------------------------|--------------------------|
| Amalgam   | <input type="checkbox"/> | <input type="checkbox"/> | <input type="checkbox"/> | <input type="checkbox"/> | <input type="checkbox"/> | <input type="checkbox"/> | <input type="checkbox"/> | <input type="checkbox"/> |
| Composite | <input type="checkbox"/> | <input type="checkbox"/> | <input type="checkbox"/> | <input type="checkbox"/> | <input type="checkbox"/> | <input type="checkbox"/> | <input type="checkbox"/> | <input type="checkbox"/> |

Sectional metal (e.g. Palodent, Garrison)

|           | 0%                       | 1-10%                    | 11-25%                   | 26-50%                   | 51-75%                   | 76-99%                   | 100%                     | not applicable           |
|-----------|--------------------------|--------------------------|--------------------------|--------------------------|--------------------------|--------------------------|--------------------------|--------------------------|
| Amalgam   | <input type="checkbox"/> | <input type="checkbox"/> | <input type="checkbox"/> | <input type="checkbox"/> | <input type="checkbox"/> | <input type="checkbox"/> | <input type="checkbox"/> | <input type="checkbox"/> |
| Composite | <input type="checkbox"/> | <input type="checkbox"/> | <input type="checkbox"/> | <input type="checkbox"/> | <input type="checkbox"/> | <input type="checkbox"/> | <input type="checkbox"/> | <input type="checkbox"/> |

Sectional clear (e.g. Bioclear)

|         | 0%                       | 1-10%                    | 11-25%                   | 26-50%                   | 51-75%                   | 76-99%                   | 100%                     | not applicable           |
|---------|--------------------------|--------------------------|--------------------------|--------------------------|--------------------------|--------------------------|--------------------------|--------------------------|
| Amalgam | <input type="checkbox"/> | <input type="checkbox"/> | <input type="checkbox"/> | <input type="checkbox"/> | <input type="checkbox"/> | <input type="checkbox"/> | <input type="checkbox"/> | <input type="checkbox"/> |

|           | 0%                       | 1-10%                    | 11-25%                   | 26-50%                   | 51-75%                   | 76-99%                   | 100%                     | not applicable           |
|-----------|--------------------------|--------------------------|--------------------------|--------------------------|--------------------------|--------------------------|--------------------------|--------------------------|
| Composite | <input type="checkbox"/> | <input type="checkbox"/> | <input type="checkbox"/> | <input type="checkbox"/> | <input type="checkbox"/> | <input type="checkbox"/> | <input type="checkbox"/> | <input type="checkbox"/> |

## 7. TECHNIQUE

How often do you use the following techniques when placing direct posterior restorations (NOT class V or localised cervical) of the indicated materials? Only select 'not applicable' if you do not place any direct posterior restorations using the indicated material. Wedge/s (when restoring a lost posterior proximal surface)

|           | 0%                       | 1-10%                    | 11-25%                   | 26-50%                   | 51-75%                   | 76-99%                   | 100%                     | not applicable           |
|-----------|--------------------------|--------------------------|--------------------------|--------------------------|--------------------------|--------------------------|--------------------------|--------------------------|
| Amalgam   | <input type="checkbox"/> | <input type="checkbox"/> | <input type="checkbox"/> | <input type="checkbox"/> | <input type="checkbox"/> | <input type="checkbox"/> | <input type="checkbox"/> | <input type="checkbox"/> |
| Composite | <input type="checkbox"/> | <input type="checkbox"/> | <input type="checkbox"/> | <input type="checkbox"/> | <input type="checkbox"/> | <input type="checkbox"/> | <input type="checkbox"/> | <input type="checkbox"/> |

## 8. TECHNIQUE

How often do you use the following materials when placing direct posterior composite restorations (NOT class V or localised cervical)? Only select 'not applicable' if you do not place any direct posterior restorations using the indicated material. Composite specific Bonding agents

|                                                                               | 0%                       | 1-10%                    | 11-25%                   | 26-50%                   | 51-75%                   | 76-99%                   | 100%                     | not applicable           |
|-------------------------------------------------------------------------------|--------------------------|--------------------------|--------------------------|--------------------------|--------------------------|--------------------------|--------------------------|--------------------------|
| Separate etch (and rinse) + bond (in 1 bottle, 2-step) eg. Optibond Solo Plus | <input type="checkbox"/> | <input type="checkbox"/> | <input type="checkbox"/> | <input type="checkbox"/> | <input type="checkbox"/> | <input type="checkbox"/> | <input type="checkbox"/> | <input type="checkbox"/> |
| Separate etch (and rinse) + prime + bond                                      | <input type="checkbox"/> | <input type="checkbox"/> | <input type="checkbox"/> | <input type="checkbox"/> | <input type="checkbox"/> | <input type="checkbox"/> | <input type="checkbox"/> | <input type="checkbox"/> |

|                                                                                                        | 0%                       | 1-10%                    | 11-25%                   | 26-50%                   | 51-75%                   | 76-99%                   | 100%                     | not applicable           |
|--------------------------------------------------------------------------------------------------------|--------------------------|--------------------------|--------------------------|--------------------------|--------------------------|--------------------------|--------------------------|--------------------------|
| (in 2 bottles, 3-step)<br>eg. Optibond FL                                                              |                          |                          |                          |                          |                          |                          |                          |                          |
| Self-etch (1 bottle) eg.<br>Prompt-L-Pop, iBond                                                        | <input type="checkbox"/> | <input type="checkbox"/> | <input type="checkbox"/> | <input type="checkbox"/> | <input type="checkbox"/> | <input type="checkbox"/> | <input type="checkbox"/> | <input type="checkbox"/> |
| Self-etching primer +<br>bond (2 bottles) eg.<br>Clearfil SE II bond                                   | <input type="checkbox"/> | <input type="checkbox"/> | <input type="checkbox"/> | <input type="checkbox"/> | <input type="checkbox"/> | <input type="checkbox"/> | <input type="checkbox"/> | <input type="checkbox"/> |
| Selective enamel etch<br>technique<br>(phosphoric acid on<br>enamel only) with<br>self-etching systems | <input type="checkbox"/> | <input type="checkbox"/> | <input type="checkbox"/> | <input type="checkbox"/> | <input type="checkbox"/> | <input type="checkbox"/> | <input type="checkbox"/> | <input type="checkbox"/> |

## 9. TECHNIQUE

How often do you use the following materials when placing direct posterior composite restorations (NOT class V or localised cervical)? Only select 'not applicable' if you do not place any direct posterior restorations using the indicated material. Composite specific Composite material/s

|                                                                                    | 0%                       | 1-10%                    | 11-25%                   | 26-50%                   | 51-75%                   | 76-99%                   | 100%                     | not applicable           |
|------------------------------------------------------------------------------------|--------------------------|--------------------------|--------------------------|--------------------------|--------------------------|--------------------------|--------------------------|--------------------------|
| Flowable bulk-fill<br>composite alone                                              | <input type="checkbox"/> | <input type="checkbox"/> | <input type="checkbox"/> | <input type="checkbox"/> | <input type="checkbox"/> | <input type="checkbox"/> | <input type="checkbox"/> | <input type="checkbox"/> |
| Paste-like bulk-fill<br>composite alone                                            | <input type="checkbox"/> | <input type="checkbox"/> | <input type="checkbox"/> | <input type="checkbox"/> | <input type="checkbox"/> | <input type="checkbox"/> | <input type="checkbox"/> | <input type="checkbox"/> |
| Flowable bulk-fill<br>composite capped<br>with a conventional<br>composite         | <input type="checkbox"/> | <input type="checkbox"/> | <input type="checkbox"/> | <input type="checkbox"/> | <input type="checkbox"/> | <input type="checkbox"/> | <input type="checkbox"/> | <input type="checkbox"/> |
| Flowable bulk-fill<br>composite capped<br>with a paste-like<br>bulk-fill composite | <input type="checkbox"/> | <input type="checkbox"/> | <input type="checkbox"/> | <input type="checkbox"/> | <input type="checkbox"/> | <input type="checkbox"/> | <input type="checkbox"/> | <input type="checkbox"/> |



|                                                              | 0%                       | 1-10%                    | 11-25%                   | 26-50%                   | 51-75%                   | 76-99%                   | 100%                     | not applicable           |
|--------------------------------------------------------------|--------------------------|--------------------------|--------------------------|--------------------------|--------------------------|--------------------------|--------------------------|--------------------------|
| Incrementally placed conventional (paste-like) composite     | <input type="checkbox"/> | <input type="checkbox"/> | <input type="checkbox"/> | <input type="checkbox"/> | <input type="checkbox"/> | <input type="checkbox"/> | <input type="checkbox"/> | <input type="checkbox"/> |
| Non-incrementally placed conventional (paste-like) composite | <input type="checkbox"/> | <input type="checkbox"/> | <input type="checkbox"/> | <input type="checkbox"/> | <input type="checkbox"/> | <input type="checkbox"/> | <input type="checkbox"/> | <input type="checkbox"/> |

## 10. TECHNIQUE

Do you have experience in using bulk-fill composites?

Yes

No

Name of bulk-fill composite/s used

I have found them ...

|                                                     | Strongly agree           | Agree                    | Neither agree nor disagree | Disagree                 | Strongly disagree        |
|-----------------------------------------------------|--------------------------|--------------------------|----------------------------|--------------------------|--------------------------|
| ... easier to place than conventional composites    | <input type="checkbox"/> | <input type="checkbox"/> | <input type="checkbox"/>   | <input type="checkbox"/> | <input type="checkbox"/> |
| ... time saving compared to conventional composites | <input type="checkbox"/> | <input type="checkbox"/> | <input type="checkbox"/>   | <input type="checkbox"/> | <input type="checkbox"/> |

|                                                                                    | Strongly agree           | Agree                    | Neither agree<br>nor disagree | Disagree                 | Strongly<br>disagree     |
|------------------------------------------------------------------------------------|--------------------------|--------------------------|-------------------------------|--------------------------|--------------------------|
| ... to have reduced post-operative sensitivity compared to conventional composites | <input type="checkbox"/> | <input type="checkbox"/> | <input type="checkbox"/>      | <input type="checkbox"/> | <input type="checkbox"/> |
| ... to have more predictable outcomes than conventional composites                 | <input type="checkbox"/> | <input type="checkbox"/> | <input type="checkbox"/>      | <input type="checkbox"/> | <input type="checkbox"/> |
| ... more aesthetic than conventional composites                                    | <input type="checkbox"/> | <input type="checkbox"/> | <input type="checkbox"/>      | <input type="checkbox"/> | <input type="checkbox"/> |

## 12. CLINICAL SCENARIOS

If you had to restore a moderately deep 2-surface mesio-occlusal cavity in an upper premolar with amalgam, how long an appointment would you book? In minutes

If you had to restore the same cavity with composite, how long an appointment would you book? In minutes

If you restored the tooth with composite privately, what fee would you charge? In £

If you restored the tooth with amalgam privately, what fee would you charge? In £

## 13. CLINICAL SCENARIOS

If you had to restore a deep 3-surface mesio-occlusal-distal cavity in a lower first molar with amalgam, how long an appointment would you book? In minutes

If you had to restore the same cavity with composite, how long an appointment would you book? In minutes

If you restored the tooth with composite privately, what fee would you charge? In £

If you restored the tooth with amalgam privately, what fee would you charge? In £

## 14. FEES

What would the percentage change in profitability be, in providing a posterior composite, rather than a posterior amalgam restoration under NHS provision? Only complete one of these two boxes please.

Percentage change

Increase

Decrease

## 15. POST-TREATMENT PROBLEMS

How often do you see the following complications within one year when using the following materials to directly restore posterior teeth (NOT class V or localised cervical)? Only select 'not applicable' if you do not place any direct posterior restorations using the indicated material. Sensitivity

|           | 0%                       | 1-10%                    | 11-25%                   | 26-50%                   | 51-75%                   | 76-99%                   | 100%                     | not applicable           |
|-----------|--------------------------|--------------------------|--------------------------|--------------------------|--------------------------|--------------------------|--------------------------|--------------------------|
| Amalgam   | <input type="checkbox"/> | <input type="checkbox"/> | <input type="checkbox"/> | <input type="checkbox"/> | <input type="checkbox"/> | <input type="checkbox"/> | <input type="checkbox"/> | <input type="checkbox"/> |
| Composite | <input type="checkbox"/> | <input type="checkbox"/> | <input type="checkbox"/> | <input type="checkbox"/> | <input type="checkbox"/> | <input type="checkbox"/> | <input type="checkbox"/> | <input type="checkbox"/> |

Food packing (when restoring a proximal contact)

|           | 0%                       | 1-10%                    | 11-25%                   | 26-50%                   | 51-75%                   | 76-99%                   | 100%                     | not applicable           |
|-----------|--------------------------|--------------------------|--------------------------|--------------------------|--------------------------|--------------------------|--------------------------|--------------------------|
| Amalgam   | <input type="checkbox"/> | <input type="checkbox"/> | <input type="checkbox"/> | <input type="checkbox"/> | <input type="checkbox"/> | <input type="checkbox"/> | <input type="checkbox"/> | <input type="checkbox"/> |
| Composite | <input type="checkbox"/> | <input type="checkbox"/> | <input type="checkbox"/> | <input type="checkbox"/> | <input type="checkbox"/> | <input type="checkbox"/> | <input type="checkbox"/> | <input type="checkbox"/> |

## 16. KNOWLEDGE BASE

The Mercury Regulation that is now in force has as one of its aims a phase-down of the use of dental amalgam. Considerations for a potential 'phase-out' of the material are currently being considered at EU level.

We wish to understand the dentists' and therapists' knowledge and opinions of the 'phase-out' with the following three questions.

**In which year is it intended that the possible 'phase-out' of amalgam ought to be complete by?**

2020

2025

2030

2035

2040

2045

2050

**In which patient groups should the use of amalgam be avoided according to current rules?**

**Over which period of time do you believe dental amalgam should be 'phased-out' in UK dental practice?**

Less than 5 years

5 – 9 years

10 – 19 years

20 – 29 years

More than 30 years

## 17. YOUR OPINIONS

Please indicate to which level you agree or disagree with the following statements:

### The 'phasing-out' of amalgam ...

|                                                                                                                                | Strongly agree           | Agree                    | Neither agree<br>nor disagree | Disagree                 | Strongly<br>disagree     |
|--------------------------------------------------------------------------------------------------------------------------------|--------------------------|--------------------------|-------------------------------|--------------------------|--------------------------|
| ... will impact on my<br>ability to do my job                                                                                  | <input type="checkbox"/> | <input type="checkbox"/> | <input type="checkbox"/>      | <input type="checkbox"/> | <input type="checkbox"/> |
| ... will lead to the need<br>for more indirect<br>restorations                                                                 | <input type="checkbox"/> | <input type="checkbox"/> | <input type="checkbox"/>      | <input type="checkbox"/> | <input type="checkbox"/> |
| ... will lead to more<br>teeth being deemed<br>unrestorable                                                                    | <input type="checkbox"/> | <input type="checkbox"/> | <input type="checkbox"/>      | <input type="checkbox"/> | <input type="checkbox"/> |
| There is a lack of<br>consensus on best<br>practice when selecting<br>direct alternative<br>materials                          | <input type="checkbox"/> | <input type="checkbox"/> | <input type="checkbox"/>      | <input type="checkbox"/> | <input type="checkbox"/> |
| There is a lack of<br>consensus on best<br>practice in terms of<br>technique when<br>directly placing<br>alternative materials | <input type="checkbox"/> | <input type="checkbox"/> | <input type="checkbox"/>      | <input type="checkbox"/> | <input type="checkbox"/> |
| My patients won't care                                                                                                         | <input type="checkbox"/> | <input type="checkbox"/> | <input type="checkbox"/>      | <input type="checkbox"/> | <input type="checkbox"/> |

## 18. YOUR OPINIONS

Please indicate to which level you agree or disagree with the following statements:

### Alternative direct materials

|                                                                                                                            | Strongly agree           | Agree                    | Neither agree<br>nor disagree | Disagree                 | Strongly<br>disagree     |
|----------------------------------------------------------------------------------------------------------------------------|--------------------------|--------------------------|-------------------------------|--------------------------|--------------------------|
| Suitable directly placed alternatives to amalgam are available                                                             | <input type="checkbox"/> | <input type="checkbox"/> | <input type="checkbox"/>      | <input type="checkbox"/> | <input type="checkbox"/> |
| I feel up to date with current techniques and practices relating to placement of posterior composites                      | <input type="checkbox"/> | <input type="checkbox"/> | <input type="checkbox"/>      | <input type="checkbox"/> | <input type="checkbox"/> |
| Having to routinely place posterior composites would cause appointment delays in my practice                               | <input type="checkbox"/> | <input type="checkbox"/> | <input type="checkbox"/>      | <input type="checkbox"/> | <input type="checkbox"/> |
| Posterior amalgams last longer than directly placed posterior composites                                                   | <input type="checkbox"/> | <input type="checkbox"/> | <input type="checkbox"/>      | <input type="checkbox"/> | <input type="checkbox"/> |
| It takes me longer to remove a failed posterior composite restoration than a failed amalgam restoration of equivalent size | <input type="checkbox"/> | <input type="checkbox"/> | <input type="checkbox"/>      | <input type="checkbox"/> | <input type="checkbox"/> |

## 19. YOUR OPINIONS

Please indicate to which level you agree or disagree with the following statements:

### Alternative direct materials

Please indicate your confidence level ...

|                                             | No confidence            | Low<br>confidence        | Moderate<br>confidence   | High<br>confidence       | Complete<br>confidence   |
|---------------------------------------------|--------------------------|--------------------------|--------------------------|--------------------------|--------------------------|
| ... in providing 2 surface direct posterior | <input type="checkbox"/> | <input type="checkbox"/> | <input type="checkbox"/> | <input type="checkbox"/> | <input type="checkbox"/> |

|                                                                                                     | No confidence            | Low confidence           | Moderate confidence      | High confidence          | Complete confidence      |
|-----------------------------------------------------------------------------------------------------|--------------------------|--------------------------|--------------------------|--------------------------|--------------------------|
| composite restorations involving a proximal surface                                                 |                          |                          |                          |                          |                          |
| ... in providing 3 surface direct posterior composite restorations involving both proximal surfaces | <input type="checkbox"/> | <input type="checkbox"/> | <input type="checkbox"/> | <input type="checkbox"/> | <input type="checkbox"/> |
| ... in providing definitive 2 surface posterior GICs involving a proximal surface                   | <input type="checkbox"/> | <input type="checkbox"/> | <input type="checkbox"/> | <input type="checkbox"/> | <input type="checkbox"/> |
| ... in providing definitive 3 surface posterior GICs involving both proximal surfaces               | <input type="checkbox"/> | <input type="checkbox"/> | <input type="checkbox"/> | <input type="checkbox"/> | <input type="checkbox"/> |
| ... when placing direct posterior composites with sub-gingival margins                              | <input type="checkbox"/> | <input type="checkbox"/> | <input type="checkbox"/> | <input type="checkbox"/> | <input type="checkbox"/> |
| ... when placing posterior amalgams with sub-gingival margins                                       | <input type="checkbox"/> | <input type="checkbox"/> | <input type="checkbox"/> | <input type="checkbox"/> | <input type="checkbox"/> |
| ... when placing direct posterior composites in patients with limited cooperation                   | <input type="checkbox"/> | <input type="checkbox"/> | <input type="checkbox"/> | <input type="checkbox"/> | <input type="checkbox"/> |
| ... when placing posterior amalgams in patients with limited cooperation                            | <input type="checkbox"/> | <input type="checkbox"/> | <input type="checkbox"/> | <input type="checkbox"/> | <input type="checkbox"/> |

## 20. DEMOGRAPHICS



At which institution did you obtain your primary dental qualification?

In which year did you obtain your primary dental qualification?

Please indicate your professional role

Dentist

Therapist

## 21. DEMOGRAPHICS

Please indicate your gender

Male

Female

Prefer not to say

Please indicate the number of sessions per week worked in (considering a morning a session, an afternoon a session and an evening a session)

Number of sessions per week worked in the following settings

Hospital

Community

Number of sessions per week worked in the following settings

Specialist practice

General practice

Approximately, what proportion of your patients do you personally provide NHS care for?

- 100% (exclusively NHS patients)
- 75-99% NHS
- 50-74% NHS
- 25-49% NHS
- 1-24% NHS
- 0% (exclusively private patients)

## 22. TRAINING

Please select the appropriate box

|                                                                                                                                         | Yes                      | No                       | Unsure                   |
|-----------------------------------------------------------------------------------------------------------------------------------------|--------------------------|--------------------------|--------------------------|
| Did you receive didactic instruction (e.g. lectures, seminars) in posterior composite placement as part of your dental school training? | <input type="checkbox"/> | <input type="checkbox"/> | <input type="checkbox"/> |
| Did you receive clinical training in posterior composite placement as part of your dental school training?                              | <input type="checkbox"/> | <input type="checkbox"/> | <input type="checkbox"/> |
| Since graduation have you attended CPD courses relating to the placement of posterior composites?                                       | <input type="checkbox"/> | <input type="checkbox"/> | <input type="checkbox"/> |

**Any further comments?**

## Appendix results tables

Appendix Table 1: Workforce by gender; female, male, or prefer not to say (PNTS)

| Clinician        |                    | Female (%) | Male (%) | PNTS (%) |
|------------------|--------------------|------------|----------|----------|
| Dentist          | NHS GD (n=615)     | 49         | 48       | 3        |
|                  | Mixed GD (n=193)   | 49         | 48       | 3        |
|                  | Private GD (n=505) | 36         | 62       | 2        |
|                  | CDS (n=118)        | 78         | 19       | 3        |
| Therapist (n=75) |                    | 89         | 7        | 4        |

Appendix Table 2: Workforce by primary dental qualification location

| Clinician        |                    | Primary dental qualification location (%) |             |        |
|------------------|--------------------|-------------------------------------------|-------------|--------|
|                  |                    | UK                                        | EU (non-UK) | Non-EU |
| Dentist          | NHS GD (n=591)     | 84                                        | 9           | 7      |
|                  | Mixed GD (n=190)   | 84                                        | 8           | 7      |
|                  | Private GD (n=503) | 89                                        | 6           | 5      |
|                  | CDS (n=116)        | 95                                        | 3           | 3      |
| Therapist (n=75) |                    | 100                                       | 0           | 0      |

Appendix Table 3: Workforce by years qualified

| Years Qualified | Clinician (%) |          |            |     |           |
|-----------------|---------------|----------|------------|-----|-----------|
|                 | Dentist       |          |            |     | Therapist |
|                 | NHS GD        | Mixed GD | Private GD | CDS |           |
| 0-5 (n=139)     | 63            | 10       | 7          | 6   | 13        |
| 6-15 (n=316)    | 53            | 12       | 15         | 7   | 13        |
| 16-25 (n=371)   | 42            | 15       | 32         | 9   | 2         |
| ≥26 (n=686)     | 30            | 13       | 49         | 8   | 1         |

Appendix Table 4: Percentage use of direct composite in molar teeth by years qualified

| Years qualified | Mean percentage of molar teeth restored with composite |    |
|-----------------|--------------------------------------------------------|----|
|                 | %                                                      | SD |
| 0-5 (n=139)     | 32                                                     | 24 |
| 6-15 (n=316)    | 40                                                     | 28 |
| 16-25 (n=371)   | 46                                                     | 33 |
| ≥26 (n=686)     | 52                                                     | 33 |

Appendix Table 5: Percentage use of direct composite in molar teeth by clinician

| Clinician           | Mean proportion of molar teeth restored with composite |    |
|---------------------|--------------------------------------------------------|----|
|                     | %                                                      | SD |
| NHS GD (n=617)      | 26                                                     | 22 |
| Mixed GD (n=193)    | 45                                                     | 25 |
| Private GD (n=509)  | 73                                                     | 26 |
| CDS dentist (n=118) | 38                                                     | 28 |
| Therapist (n=75)    | 41                                                     | 29 |

Appendix Table 6: Appointment time booked to place direct posterior mesio-occluso-distal (MOD) composite by clinician type

| Clinician           | Appointment time booked MOD composite (mins) |    |        |
|---------------------|----------------------------------------------|----|--------|
|                     | Mean                                         | SD | Range  |
| NHS GD (n=612)      | 39                                           | 10 | 15-75  |
| Mixed GD (n=191)    | 43                                           | 11 | 20-105 |
| Private GD (n=505)  | 46                                           | 11 | 20-100 |
| CDS Dentist (n=115) | 43                                           | 9  | 20-60  |
| Therapist (n=75)    | 44                                           | 15 | 20-120 |

Appendix Table 7: Composite technique use (N/A= not applicable, i.e. the clinician does not use composite)

| Composite technique                    | % use |       |        |         |     |
|----------------------------------------|-------|-------|--------|---------|-----|
|                                        | 0%    | 1-25% | 26-75% | 76-100% | N/A |
| Rubber dam (n=1501)                    | 32    | 37    | 16     | 12      | 3   |
| Circumferential metal matrix* (n=1501) | 5     | 14    | 19     | 61      | 1   |
| Sectional metal matrix* (n=1477)       | 49    | 16    | 12     | 15      | 7   |
| Circumferential clear matrix* (n=1476) | 59    | 18    | 9      | 7       | 6   |
| Sectional clear matrix* (n=1494)       | 75    | 8     | 3      | 2       | 11  |
| Liner (n=1488)                         | 28    | 45    | 19     | 17      | 1   |
| Wedge* (n=1505)                        | 4     | 16    | 21     | 57      | 1   |

\*Technique use when restoring a lost proximal surface.

Appendix Table 8: Composite material use (N/A= not applicable, i.e. the clinician does not use composite)

| Composite material                              | % use |       |        |         |     |
|-------------------------------------------------|-------|-------|--------|---------|-----|
|                                                 | 0%    | 1-25% | 26-75% | 76-100% | N/A |
| Bulk-fill flowable only (n=1374)                | 55    | 26    | 5      | 4       | 9   |
| Bulk-fill paste only (n=1304)                   | 59    | 14    | 8      | 7       | 12  |
| Bulk-fill flow & conventional paste (n=1364)    | 35    | 24    | 18     | 15      | 8   |
| Bulk-fill flow & bulk-fill paste (n=1264)       | 68    | 9     | 5      | 3       | 14  |
| Incremental conventional composite (n=1443)     | 6     | 14    | 20     | 57      | 3   |
| Non-incremental conventional composite (n=1254) | 63    | 17    | 4      | 2       | 13  |

Appendix Table 9: Bonding technique use (N/A= not applicable, i.e. the clinician does not use composite)

| Bonding technique use                                       | % use |       |        |         |     |
|-------------------------------------------------------------|-------|-------|--------|---------|-----|
|                                                             | 0%    | 1-25% | 26-75% | 76-100% | N/A |
| Total-etch 2 step (n=1413)                                  | 14    | 6     | 7      | 71      | 3   |
| Total-etch 3 step (n=1271)                                  | 65    | 6     | 3      | 14      | 12  |
| Selective-etch 1 step (n=1265)                              | 63    | 11    | 6      | 9       | 11  |
| Selective-etch 2 step (n=1238)                              | 77    | 5     | 2      | 4       | 14  |
| Selective enamel etch (with selective etch system) (n=1286) | 63    | 10    | 4      | 11      | 12  |

Appendix Table 10: Clinician reported incidence of sensitivity following direct posterior composite placement by clinician type

| Clinician                      | Sensitivity incidence post composite placement (%) |        |        |         |
|--------------------------------|----------------------------------------------------|--------|--------|---------|
|                                | 0-10%                                              | 11-25% | 26-50% | 51-100% |
| NHS GD dentist (%) (n=607)     | 41                                                 | 36     | 17     | 6       |
| Mixed GD dentist (%) (n=192)   | 46                                                 | 34     | 15     | 6       |
| Private GD Dentist (%) (n=507) | 74                                                 | 18     | 5      | 2       |
| CDS dentist (%) (n=115)        | 48                                                 | 33     | 14     | 5       |
| Therapist (%) (n=72)           | 36                                                 | 32     | 17     | 15      |

Appendix Table 11: Clinician reported incidence of food packing following direct posterior composite placement by clinician type

| Clinician                      | Food packing incidence post composite placement (%) |        |        |         |
|--------------------------------|-----------------------------------------------------|--------|--------|---------|
|                                | 0-10%                                               | 11-25% | 26-50% | 51-100% |
| NHS GD dentist (%) (n=613)     | 49                                                  | 33     | 12     | 6       |
| Mixed GD dentist (%) (n=193)   | 52                                                  | 32     | 11     | 5       |
| Private GD Dentist (%) (n=507) | 70                                                  | 24     | 5      | 2       |
| CDS dentist (%) (n=113)        | 60                                                  | 30     | 8      | 2       |
| Therapist (%) (n=70)           | 60                                                  | 21     | 13     | 6       |



Appendix Table 12: Reported incidence of post-operative sensitivity following direct posterior composite placement by years qualified

| Years qualified | Sensitivity incidence post composite placement (%) |        |        |         |
|-----------------|----------------------------------------------------|--------|--------|---------|
|                 | 0-10%                                              | 11-25% | 26-50% | 51-100% |
| 0-5 (n=138)     | 43                                                 | 30     | 20     | 7       |
| 6-15 (n=313)    | 40                                                 | 36     | 17     | 7       |
| 16-25 (n=362)   | 54                                                 | 29     | 12     | 5       |
| ≥26 (n=679)     | 61                                                 | 26     | 9      | 4       |

Appendix Table 13: Reported incidence of post-operative food packing following direct posterior composite placement by years qualified

| Years qualified | Food packing incidence post composite placement (%) |        |        |         |
|-----------------|-----------------------------------------------------|--------|--------|---------|
|                 | 0-10%                                               | 11-25% | 26-50% | 51-100% |
| 0-5 (n=138)     | 53                                                  | 30     | 12     | 5       |
| 6-15 (n=311)    | 53                                                  | 32     | 11     | 4       |
| 16-25 (n=367)   | 58                                                  | 28     | 10     | 4       |
| ≥26 (n=680)     | 61                                                  | 28     | 7      | 4       |

Appendix Table 14: Reported incidence of post-operative sensitivity following amalgam placement by years qualified

| Years qualified | Sensitivity incidence post amalgam placement (%) |        |        |         |
|-----------------|--------------------------------------------------|--------|--------|---------|
|                 | 0-10%                                            | 11-25% | 26-50% | 51-100% |
| 0-5 (n=134)     | 64                                               | 28     | 5      | 2       |
| 6-15 (n=301)    | 71                                               | 23     | 4      | 2       |
| 16-25 (n=331)   | 81                                               | 15     | 3      | 0       |
| ≥26 (n=601)     | 89                                               | 9      | 1      | 1       |

Appendix Table 15: Reported incidence of post-operative food packing following amalgam placement by years qualified

| Years qualified | Food packing incidence post amalgam placement (%) |        |        |         |
|-----------------|---------------------------------------------------|--------|--------|---------|
|                 | 0-10%                                             | 11-25% | 26-50% | 51-100% |
| 0-5 (n=134)     | 69                                                | 19     | 9      | 2       |
| 6-15 (n=300)    | 75                                                | 20     | 4      | 1       |
| 16-25 (n=333)   | 85                                                | 12     | 2      | 1       |
| ≥26 (n=601)     | 92                                                | 6      | 1      | 1       |

Appendix Table 16: Experience of use of categories of bulk-fill composites

| Category of bulk-fill composite              | Experience of use (%) |
|----------------------------------------------|-----------------------|
| Flowable light-cured (n=278)                 | 53                    |
| Paste light-cured (n=170)                    | 32                    |
| Dual cured (n=32)                            | 6                     |
| Non-bulk-fill composite/non-composite (n=40) | 8                     |

Appendix Table 17: Opinions on bulk-fill composites in relation to standard composites

| Bulk-fill composites in relation to standard composites | Agree/Strongly agree (%) | Neither agree nor disagree (%) | Disagree/Strongly disagree (%) |
|---------------------------------------------------------|--------------------------|--------------------------------|--------------------------------|
| Easier to place (n=1033)                                | 68                       | 26                             | 6                              |
| Time-saving (n=1029)                                    | 81                       | 16                             | 3                              |
| Reduced post-op sensitivity (n=1025)                    | 28                       | 63                             | 9                              |
| More predictable (n=1024)                               | 27                       | 60                             | 14                             |
| More aesthetic (n=1027)                                 | 7                        | 38                             | 55                             |

Appendix Table 18 details the multiple linear regression to explore the influence of various factors on appointment time booked. The significant independent variables and their referents are more thoroughly explained in the text.

Appendix Table 18: Factors related to appointment time booked for direct posterior mesio-occluso-distal (MOD) composite restoration. n=769; p<0.001; Adjusted R<sup>2</sup>=0.15

| Independent variable (predictor)                                                                                   | Coefficient | Standard error | t     | P>t          | 95% Confidence interval |
|--------------------------------------------------------------------------------------------------------------------|-------------|----------------|-------|--------------|-------------------------|
| <b>No undergraduate clinical teaching</b> ( <i>ref had UG teaching</i> )                                           | 0.23        | 0.93           | 0.24  | 0.808        | -1.59 - 2.05            |
| <b>No postgraduate training</b> ( <i>ref had PG training</i> )                                                     | -0.31       | 1.25           | -0.25 | 0.802        | -2.77 - 2.14            |
| <b>UK primary dental qualification</b> ( <i>ref non-UK</i> )                                                       | -1.02       | 1.22           | -0.83 | 0.404        | -3.42 - 1.38            |
| <b>Type of practice</b> ( <i>ref NHS general dentist 75-100% NHS patient base</i> )                                |             |                |       |              |                         |
| Private general dentist (0-24% NHS patient base)                                                                   | 5.77        | 1.15           | 5.04  | <b>0.000</b> | 3.52 - 8.02             |
| Mixed general dentist (25-74% NHS patient base)                                                                    | 3.50        | 1.24           | 2.83  | <b>0.005</b> | 1.07 - 5.92             |
| CDS dentist                                                                                                        | 2.06        | 1.59           | 1.29  | 0.198        | -1.07 - 5.18            |
| Therapist                                                                                                          | 4.83        | 2.06           | 2.35  | <b>0.019</b> | 0.79 - 8.88             |
| <b>Years qualified</b>                                                                                             | -0.07       | 0.04           | -1.73 | 0.085        | -0.16 - 0.01            |
| <b>Female</b> ( <i>ref male</i> )                                                                                  | -0.32       | 0.81           | -0.39 | 0.694        | -1.91 - 1.27            |
| <b>Composite user (combined premolar and molar composite usage &gt; 100%)</b> ( <i>ref combined use &lt;100%</i> ) | -0.48       | 0.95           | -0.51 | 0.613        | -2.35 - 1.39            |
| <b>Incremental composite user (76-100% use)</b> ( <i>ref &lt;76% incremental</i> )                                 | 1.92        | 0.79           | 2.44  | <b>0.015</b> | 0.37 - 3.45             |
| <b>Bonding system use</b> ( <i>ref self-etch 1 step (76-100% use)</i> )                                            |             |                |       |              |                         |
| Total-etch 3 step bond (76-100% use)                                                                               | 3.01        | 1.46           | 2.06  | <b>0.040</b> | 0.14 - 5.88             |
| Total-etch 2 step bond (76-100% use)                                                                               | 2.19        | 1.03           | 2.12  | <b>0.034</b> | 0.16 - 4.21             |
| Self-etch 2 step bond (76-100% use)                                                                                | -3.24       | 2.85           | -1.14 | 0.255        | -8.83 - 2.34            |
| <b>Matrix use</b> ( <i>ref not CM or SM user</i> )                                                                 |             |                |       |              |                         |
| Circumferential metal user (100% use)                                                                              | 0.46        | 0.87           | 0.53  | 0.597        | -1.25 - 2.17            |
| Sectional metal user (51-100% use)                                                                                 | 3.54        | 1.13           | 3.12  | <b>0.002</b> | 1.32 - 5.77             |
| <b>High wedge use (76-100% use)</b> ( <i>ref &lt;76% use</i> )                                                     | 1.55        | 0.84           | 1.84  | 0.066        | -0.10 - 3.21            |
| <b>Never liner use</b> ( <i>ref &gt;0% use</i> )                                                                   | 0.89        | 0.85           | 1.05  | 0.293        | -0.77 - 2.55            |
| <b>Rubber dam use</b> ( <i>ref 1-75% use</i> )                                                                     |             |                |       |              |                         |
| Never                                                                                                              | -2.38       | 0.90           | -2.65 | <b>0.008</b> | -4.14 - -0.62           |
| High (76-100% use)                                                                                                 | 5.79        | 1.26           | 4.61  | <b>0.000</b> | 3.33 - 8.26             |
| <b>High confidence MOD composite placer</b> ( <i>ref not high confidence</i> )                                     | -2.01       | 0.89           | -2.25 | <b>0.024</b> | -3.76 - -0.26           |
| <b>Constant</b>                                                                                                    | 39.02       | 1.99           | 19.65 | 0.000        | 35.12 - 42.92           |

Appendix Table 19 details the multiple linear regression to explore the influence of various factors on private fee charged for an MOD composite.

Appendix Table 19: Factors related to private fee charged for a direct posterior mesio-occluso-distal (MOD) composite restoration. n=711; p<0.0001; adjusted R<sup>2</sup>=0.28

| Independent variable (predictor)                                                                          | Coefficient | Standard error | t     | P>t          | 95% confidence interval |
|-----------------------------------------------------------------------------------------------------------|-------------|----------------|-------|--------------|-------------------------|
| <b>Appointment time booked MOD composite</b>                                                              | 1.43        | 0.16           | 9.07  | <b>0.000</b> | 1.12 – 1.75             |
| <b>No undergraduate clinical teaching (ref had UG teaching)</b>                                           | -0.30       | 4.08           | -0.07 | 0.941        | -8.30 – 7.70            |
| <b>No postgraduate training (ref had PG training)</b>                                                     | -2.33       | 5.63           | -0.41 | 0.679        | -13.39 – 8.72           |
| <b>UK primary dental qualification (ref non-UK)</b>                                                       | -7.88       | 5.28           | -1.49 | 0.136        | -18.24 – 2.48           |
| <b>Type of practice (ref NHS general dentist 75-100% NHS patient base)</b>                                |             |                |       |              |                         |
| Private general dentist (0-24% NHS patient base)                                                          | 27.56       | 5.11           | 5.39  | <b>0.000</b> | 17.51 – 37.60           |
| Mixed general dentist (25-74% NHS patient base)                                                           | 12.91       | 5.31           | 2.43  | <b>0.015</b> | 2.49 – 23.33            |
| CDS dentist                                                                                               | 19.58       | 10.77          | 1.82  | 0.070        | -1.57 – 40.73           |
| Therapist                                                                                                 | 11.86       | 9.95           | 1.19  | 0.234        | -7.69 – 31.40           |
| <b>Years qualified</b>                                                                                    | -0.01       | 0.19           | -0.06 | 0.950        | -0.38 – 0.36            |
| <b>Female (ref male)</b>                                                                                  | -3.64       | 3.50           | -1.04 | 0.299        | -10.52 – 3.24           |
| <b>Composite user (combined premolar and molar composite usage &gt; 100%) (ref combined use &lt;100%)</b> | 1.25        | 4.39           | 0.28  | 0.777        | -7.38 – 9.87            |
| <b>Incremental composite user (76-100% use) (ref &lt;76% incremental)</b>                                 | 8.04        | 3.47           | 2.32  | <b>0.021</b> | 1.23 – 14.86            |
| <b>Bonding system use (ref self-etch 1 step (76-100% use))</b>                                            |             |                |       |              |                         |
| Total-etch 3 step bond (76-100% use)                                                                      | 8.81        | 6.40           | 1.38  | 0.169        | -3.76 – 21.38           |
| Total-etch 2 step bond (76-100% use)                                                                      | -4.33       | 4.53           | -0.96 | 0.340        | -13.21 – 4.56           |
| Self-etch 2 step bond (76-100% use)                                                                       | -3.03       | 12.43          | -0.24 | 0.808        | -27.44 – 21.39          |
| <b>Matrix use (ref not CM or SM user)</b>                                                                 |             |                |       |              |                         |
| Circumferential metal user (100% use)                                                                     | .571        | 3.87           | 0.15  | 0.883        | -7.03 – 8.17            |
| Sectional metal user (51-100% use)                                                                        | -7.34       | 4.89           | -1.50 | 0.134        | -16.94 – 2.26           |
| <b>High wedge use (76-100% use) (ref &lt;76% use)</b>                                                     | 9.19        | 3.73           | 2.46  | <b>0.014</b> | 1.85 – 16.52            |
| <b>Never liner use (ref &gt;0% use)</b>                                                                   | 1.82        | 3.65           | 0.50  | 0.618        | -5.34 – 8.98            |
| <b>Rubber dam use (ref 1-75% use)</b>                                                                     |             |                |       |              |                         |
| Never                                                                                                     | -10.53      | 3.98           | -2.65 | <b>0.008</b> | -18.35 – 2.72           |
| High (76-100% use)                                                                                        | 7.98        | 5.49           | 1.45  | 0.146        | -2.79 – 18.76           |
| <b>High confidence MOD composite placer (ref not high confidence)</b>                                     | 8.47        | 4.01           | 2.11  | <b>0.035</b> | 0.60 – 16.34            |
| <b>Constant</b>                                                                                           | 62.36       | 10.63          | 5.86  | 0.000        | 41.49- 83.24            |

Appendix Table 20 details the regression to explore the influence of various factors on reported incidence of post-operative sensitivity.

Appendix Table 20: Factors related to low reported incidence of post-operative sensitivity following direct posterior composite placement.  $n=770$ ;  $p<0.0001$ ; pseudo  $R^2=0.11$

| Independent variable (predictor)                                                                          | Odds ratio | Standard error | z     | P>z          | 95% confidence interval |
|-----------------------------------------------------------------------------------------------------------|------------|----------------|-------|--------------|-------------------------|
| <b>Appointment time booked MOD composite</b>                                                              | 1.01       | 0.01           | 0.75  | 0.456        | 0.99 – 1.02             |
| <b>No undergraduate clinical teaching (ref had UG teaching)</b>                                           | 0.99       | 0.19           | -0.05 | 0.962        | 0.68 – 1.45             |
| <b>No postgraduate training (ref had PG training)</b>                                                     | 1.21       | 0.31           | 0.74  | 0.457        | 0.73 – 2.00             |
| <b>UK primary dental qualification (ref non-UK)</b>                                                       | 1.00       | 0.25           | 0.00  | 0.997        | 0.61 – 1.63             |
| <b>Type of practice (ref NHS general dentist 75-100% NHS patient base)</b>                                |            |                |       |              |                         |
| Private general dentist (0-24% NHS patient base)                                                          | 1.50       | 0.36           | 1.72  | 0.085        | 0.95 – 2.40             |
| Mixed general dentist (25-74% NHS patient base)                                                           | 0.66       | 0.17           | -1.63 | 0.103        | 0.40 – 1.09             |
| CDS dentist                                                                                               | 1.14       | 0.36           | 0.43  | 0.670        | 0.62 – 2.12             |
| Therapist                                                                                                 | 0.39       | 0.18           | -2.05 | <b>0.040</b> | 0.16 – 0.96             |
| <b>Years qualified</b>                                                                                    | 1.01       | 0.01           | 1.32  | 0.186        | 0.99 – 1.03             |
| <b>Female (ref male)</b>                                                                                  | 1.15       | 0.19           | 0.81  | 0.416        | 0.82 – 1.60             |
| <b>Composite user (combined premolar and molar composite usage &gt; 100%) (ref combined use &lt;100%)</b> | 2.33       | 0.44           | 4.48  | <b>0.000</b> | 1.61 – 3.38             |
| <b>Incremental composite user (76-100% use) (ref &lt;76% incremental)</b>                                 | 1.15       | 0.19           | 0.82  | 0.410        | 0.83 – 1.58             |
| <b>Bonding system use (ref self-etch 1 step (76-100% use))</b>                                            |            |                |       |              |                         |
| Total-etch 3 step bond (76-100% use)                                                                      | 0.88       | 0.27           | -0.42 | 0.677        | 0.48 – 1.62             |
| Total-etch 2 step bond (76-100% use)                                                                      | 0.68       | 0.15           | -1.77 | 0.076        | 0.44 – 1.04             |
| Self-etch 2 step bond (76-100% use)                                                                       | 3.15       | 2.57           | 1.40  | 0.160        | 0.64 – 15.62            |
| <b>Matrix use (ref not CM or SM user)</b>                                                                 |            |                |       |              |                         |
| Circumferential metal user (100% use)                                                                     | 1.12       | 0.20           | 0.66  | 0.512        | 0.79 – 1.59             |
| Sectional metal user (51-100% use)                                                                        | 1.56       | 0.38           | 1.81  | 0.070        | 0.96 – 2.52             |
| <b>High wedge use (76-100% use) (ref &lt;76% use)</b>                                                     | 1.18       | 0.21           | 0.96  | 0.335        | 0.84 – 1.67             |
| <b>Never liner use (ref &gt;0% use)</b>                                                                   | 1.75       | 0.31           | 3.14  | <b>0.002</b> | 1.23 – 2.49             |
| <b>Rubber dam use (ref 1-75% use)</b>                                                                     |            |                |       |              |                         |
| Never                                                                                                     | 0.88       | 0.17           | -0.66 | 0.511        | 0.61 – 1.28             |
| High (76-100% use)                                                                                        | 1.05       | 0.28           | 0.17  | 0.868        | 0.62 – 1.78             |
| <b>Constant</b>                                                                                           | 0.37       | 0.18           | -2.02 | 0.043        | 0.14 – 0.97             |

Appendix Table 21 details the regression to explore the influence of various factors on incidence of post-operative food packing.

Appendix Table 21: Factors related to low reported incidence of reported post-operative food packing following direct posterior composite placement. A logistic regression analysis; n=768; p<0.0001; pseudo R<sup>2</sup>= 0.09

| Independent variable (predictor)                                                                          | Odds ratio | Standard error | z     | P>z          | 95% confidence interval |
|-----------------------------------------------------------------------------------------------------------|------------|----------------|-------|--------------|-------------------------|
| <b>Appointment time booked MOD composite</b>                                                              | 0.99       | 0.01           | -1.25 | 0.212        | 0.98 – 1.01             |
| <b>No undergraduate clinical teaching (ref had UG teaching)</b>                                           | 0.81       | 0.16           | -1.10 | 0.273        | 0.55 – 1.18             |
| <b>No postgraduate training (ref had PG training)</b>                                                     | 0.94       | 0.24           | -0.25 | 0.805        | 0.58 – 1.54             |
| <b>UK primary dental qualification (ref non-UK)</b>                                                       | 1.04       | 0.26           | 0.15  | 0.884        | 0.63 – 1.70             |
| <b>Type of practice (ref NHS general dentist 75-100% NHS patient base)</b>                                |            |                |       |              |                         |
| Private general dentist (0-24% NHS patient base)                                                          | 0.78       | 0.19           | -1.02 | 0.310        | 0.48 – 1.26             |
| Mixed general dentist (25-74% NHS patient base)                                                           | 0.66       | 0.17           | -1.65 | 0.098        | 0.40 – 1.08             |
| CDS dentist                                                                                               | 0.95       | 0.31           | -0.17 | 0.867        | 0.50 – 1.79             |
| Therapist                                                                                                 | 1.25       | 0.54           | 0.51  | 0.608        | 0.53 – 2.92             |
| <b>Years qualified</b>                                                                                    | 1.01       | 0.01           | 1.05  | 0.292        | 0.99 – 1.03             |
| <b>Female (ref male)</b>                                                                                  | 0.87       | 0.15           | -0.83 | 0.406        | 0.63 – 1.21             |
| <b>Composite user (combined premolar and molar composite usage &gt; 100%) (ref combined use &lt;100%)</b> | 2.81       | 0.56           | 5.22  | <b>0.000</b> | 1.91 – 4.15             |
| <b>Incremental composite user (76-100% use) (ref &lt;76% incremental)</b>                                 | 1.60       | 0.27           | 2.84  | <b>0.005</b> | 1.16 – 2.22             |
| <b>Bonding system use (ref self-etch 1 step (76-100% use))</b>                                            |            |                |       |              |                         |
| Total-etch 3 step bond (76-100% use)                                                                      | 1.09       | 0.35           | 0.27  | 0.784        | 0.59 – 2.03             |
| Total-etch 2 step bond (76-100% use)                                                                      | 0.90       | 0.20           | -0.50 | 0.619        | 0.58 – 1.38             |
| Self-etch 2 step bond (76-100% use)                                                                       | 2.25       | 1.56           | 1.18  | 0.239        | 0.58 – 8.72             |
| <b>Matrix use (ref not CM or SM user)</b>                                                                 |            |                |       |              |                         |
| Circumferential metal user (100% use)                                                                     | 0.89       | 0.16           | -0.67 | 0.504        | 0.63 – 1.25             |
| Sectional metal user (51-100% use)                                                                        | 2.48       | 0.64           | 3.51  | <b>0.000</b> | 1.49 – 4.12             |
| <b>High wedge use (76-100% use) (ref &lt;76% use)</b>                                                     | 1.17       | 0.20           | 0.91  | 0.361        | 0.83 – 1.64             |
| <b>Never liner use (ref &gt;0% use)</b>                                                                   | 1.07       | 0.19           | 0.38  | 0.705        | 0.76 – 1.51             |
| <b>Rubber dam use (ref 1-75% use)</b>                                                                     |            |                |       |              |                         |
| Never                                                                                                     | 0.81       | 0.15           | -1.17 | 0.240        | 0.56 – 1.16             |
| High (76-100% use)                                                                                        | 1.42       | 0.40           | 1.23  | 0.219        | 0.81 – 2.48             |
| <b>Constant</b>                                                                                           | 0.98       | 0.48           | -0.04 | 0.972        | 0.37 – 2.58             |
